# Supplementary material for: Size control of gold nanoparticles by intense X-ray irradiation: the relevant parameters and imaging applications
Source: Royal Society of Chemistry journal article supplement (doi:10.1039/c2ra20260c), 2012-01-01
Supplement: c2ra20260c.pdf [file c2ra20260c.pdf]

SUPPORTING INFORMATION

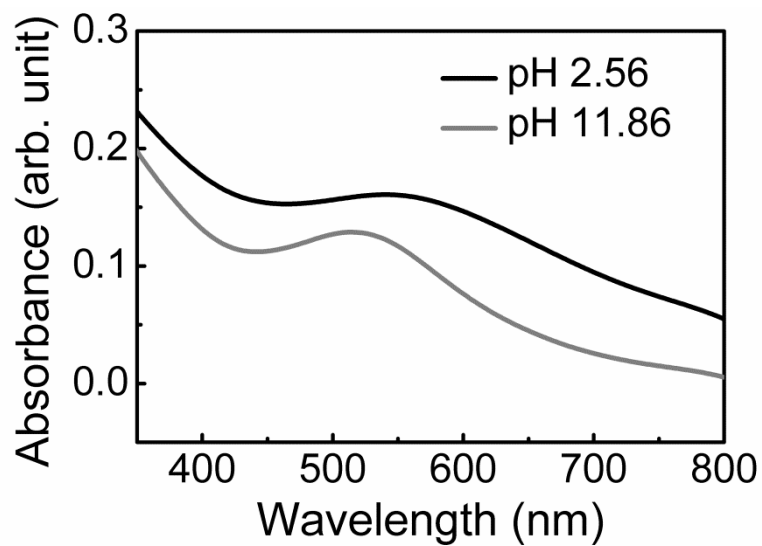

**Figure S1.** UV-visible spectra of MUA-Au solution synthesized under acidic condition obtained before and after adjusting the pH to about 12.

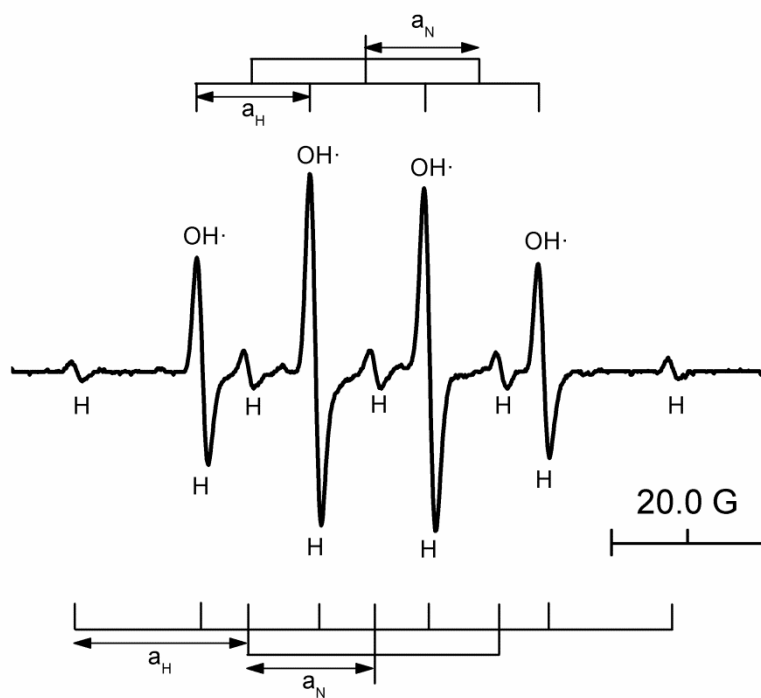

**Figure S2.** EPR spectrum of spin adducts DMSO-OH from our X-ray irradiated

solution and the corresponding reaction for production of DMSO-OH.
